# Supplementary material
Source: PubMed Central journal article supplement (PMC6766887)

# 6 month ROIs:

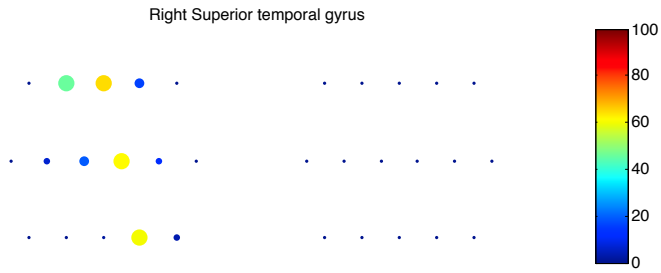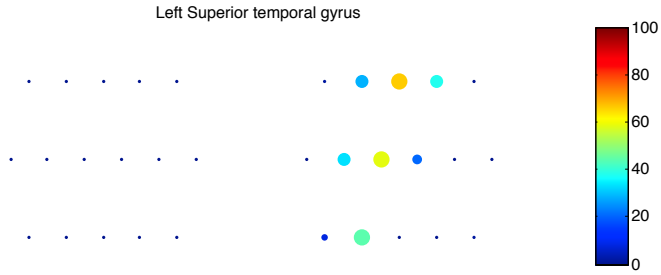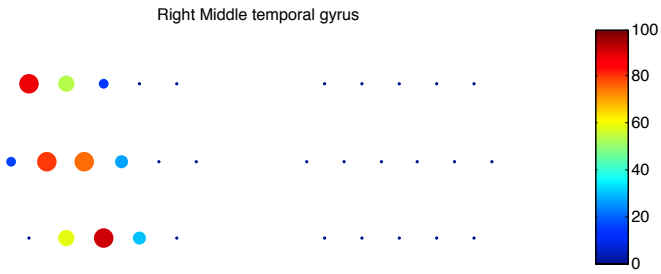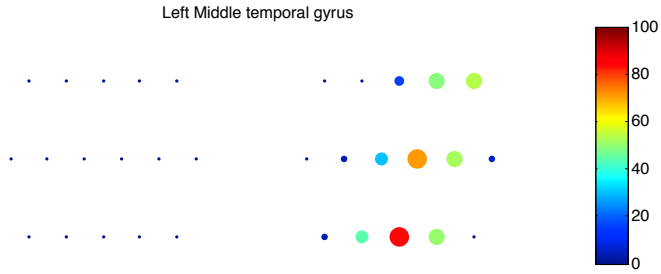

# 36 month ROIs:

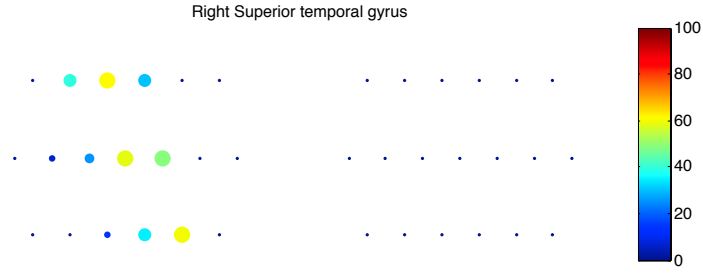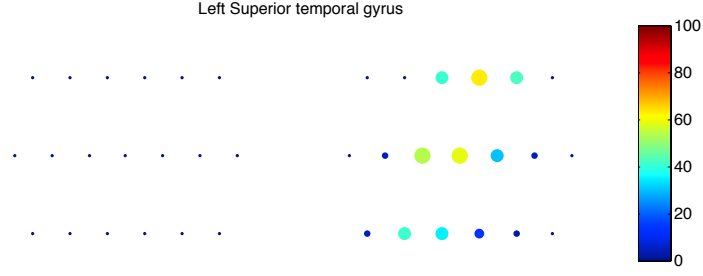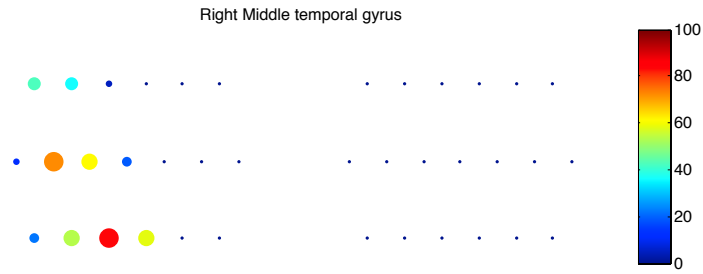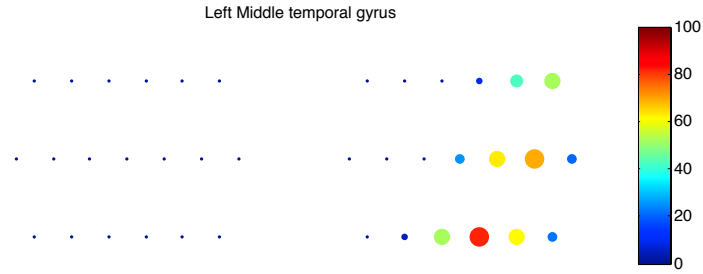

Supplement: DESC-22-na-s001.pdf [file DESC-22-na-s001.pdf]
